# Supplementary material for: Inhibition of serum and glucocorticoid regulated kinase-1 as novel therapy for cardiac arrhythmia disorders
Source: PubMed Central journal article supplement (PMC5428512; doi:10.1038/s41598-017-00413-3), 2017-03-23
Supplement: 41598_2017_413_MOESM1_ESM.pdf [file 41598_2017_413_MOESM1_ESM.pdf]

## **Supplementary Information:**

### **Inhibition of serum and glucocorticoid regulated kinase-1 as novel therapy for cardiac arrhythmia disorders**

Vassilios J. Bezzerides<sup>1,2</sup>, Aifeng Zhang<sup>1,5</sup>, Ling Xiao<sup>5</sup>, Bridget Simonson<sup>1,5</sup>, Santosh A. Khedkar<sup>1,3</sup>, Shiro Baba<sup>6</sup>, Filomena Ottaviano<sup>1</sup>, Stacey Lynch<sup>4</sup>, Katherine Hessler<sup>1</sup>, Alan C. Rigby<sup>1,4</sup>, David Milan<sup>5</sup>, Saumya Das<sup>1,5\*</sup> and Anthony Rosenzweig<sup>1,5\*</sup>.

1. Beth Israel Deaconess Medical Center, Boston, MA.
2. Boston Children's Hospital, Department of Cardiology, Boston, MA.
3. Current address: ChemBio Discovery Solutions, Lexington, MA.
4. Warp Drive Bio Inc., Cambridge, MA.
5. Massachusetts General Hospital, Boston, MA.
6. Graduate School of Medicine Kyoto University, Kyoto City, Japan.

\*: These authors contributed equally to the work.

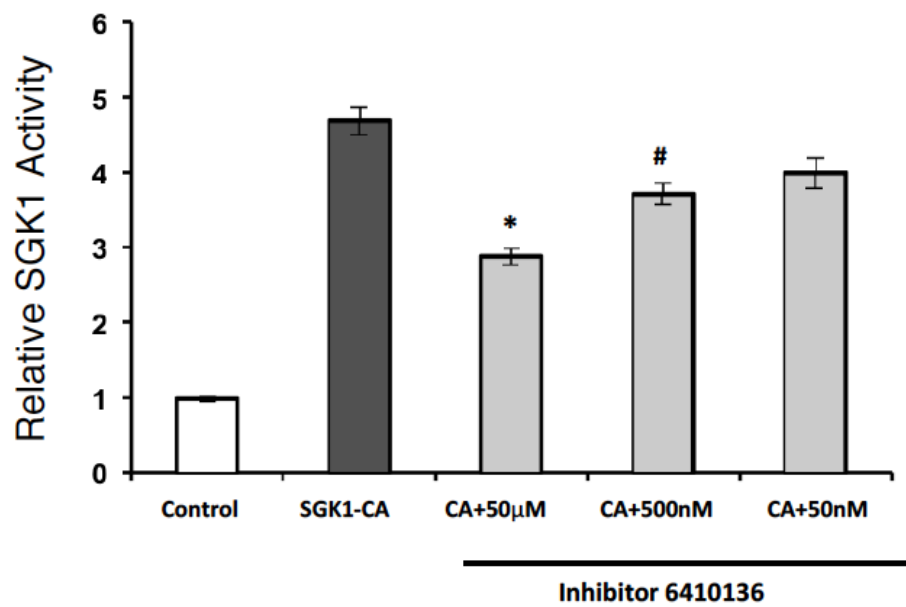

Supplemental Figure 1: Inhibition of SGK1 activity by additional SGK1 inhibitor compound 6410136 in cardiomyocytes

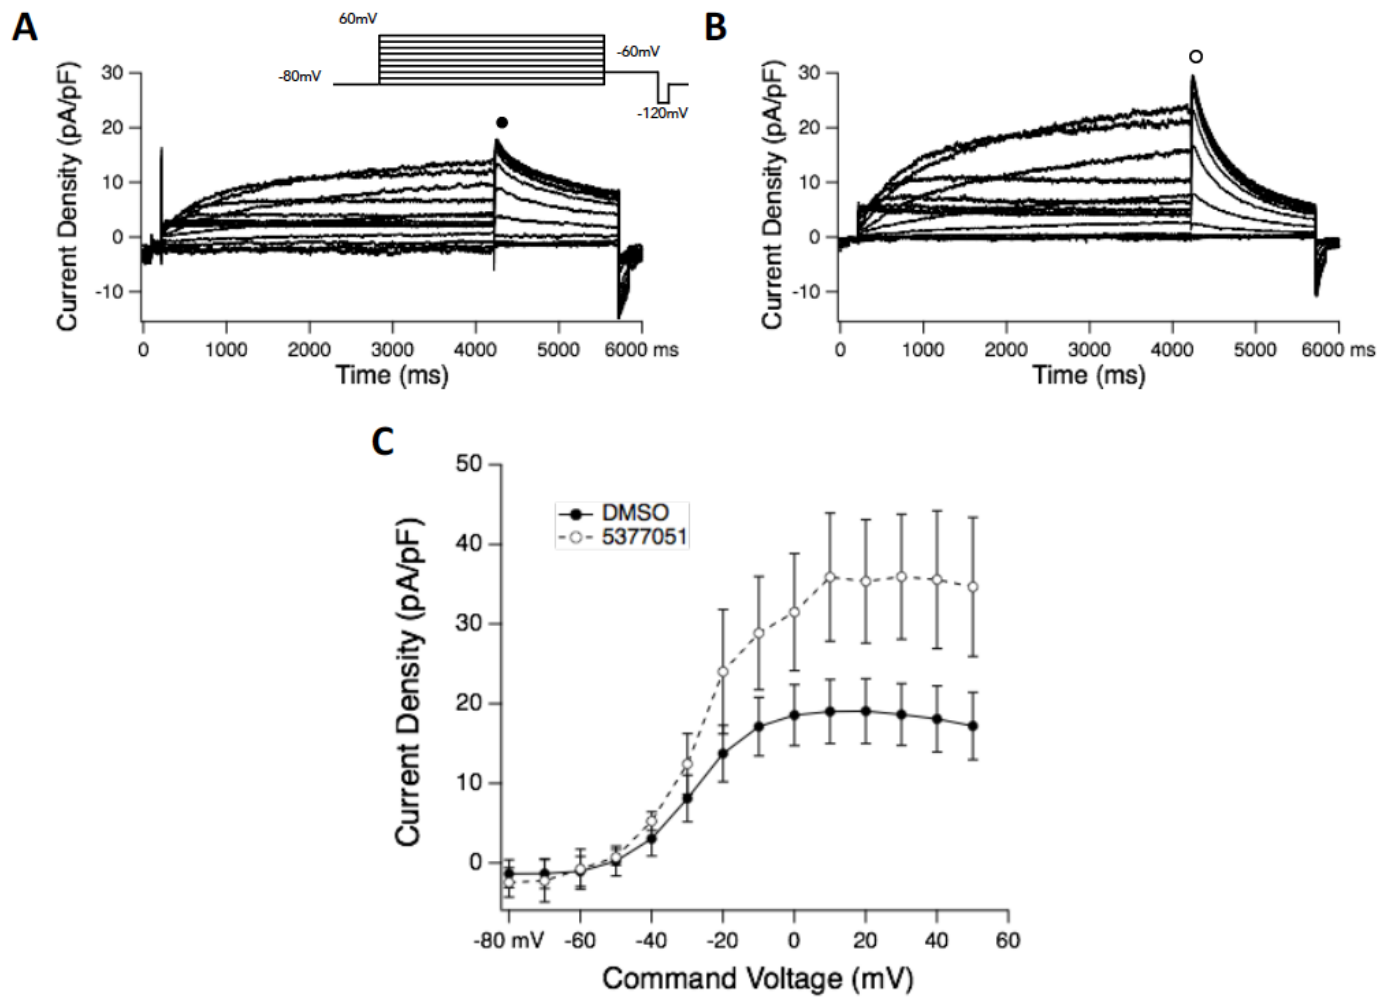

Supplemental Figure 2: Increase in hERG tail currents with SGK1 inhibitor. Representative traces from HEK cells expressing hERG either pre incubated for 5 minutes with **A**. DMSO or **B**. SGK1 inhibitor 5377051. **C**. Combined tail current data from n = 3-4 cells per condition, using voltage protocol as shown in inset in A and measured as indicated.
